# Supplementary material for: Control of two protozoal infections (Cystoisospora ohioensis and Pentatrichomonas hominis) in laboratory-bred common marmoset (Callithrix jacchus) colony
Source: Research Square preprint supplement (doi:10.21203/rs.3.rs-8553505/v1), 2026-02-20
Supplement: Supplementary file 1 [file 2320d11757667351dd1a2487.xlsx]

## Sheet: Sheet1
Table S1. Fecal direct examination (Exam) results of marmoset colony. 1st and 2nd examination were tested for pooling voided fecal samples obtained from each cages. 3rd examination were tested for individual animal after examination for pooling voided fecal samples which were positive in 2nd examination. Number of positive individual animals were presented in parenthesis
Rack	Room	Number	1st Exam	2nd Exam	3rd Exam
1	1303	2	-	-	-
2	1303	4	PT	-	-
3	1303	3	-	-	-
4	1303	4	-	-	-
5	1303	4	-	PT	PT (1)
6	1303	8	-	-	-
7	1303	5	-	-	-
8	1303	5	-	PT	-
9	1303	3	-	PT	PT (1)
10	1303	4	-	-	-
11	1303	3	-	-	-
12	1303	4	-	-	-
13	1303	3	-	-	-
14	1303	5	-	-	-
15	1303	4	-	PT	-
16	1303	4	-	-	-
17	1303	5	-	PT	PT (1)
18	1303	4	-	-	-
19	1303	4	-	-	-
20	1307	4	-	-	-
21	1307	4	-	-	-
22	1307	4	PT	PT	-
23	1307	4	-	-	-
24	1307	4	-	-	-
25	1307	4	-	-	-
26	1307	4	PT	-	-
27	1307	5	-	-	-
28	1307	4	-	-	-
29	1307	4	-	-	-
30	1307	4	PT	-	-
31	1307	2	-	-	-
32	1307	4	-	-	-
33	1306	3	-	PT	-
34	1306	3	-	-	-
35	1306	3	-	-	-
36	1306	3	-	-	-
37	1306	3	-	-	-
38	1306	3	-	-	-
39	1306	4	-	-	-
40	1313	3	-	-	-
41	1313	3	-	-	-
42	1313	4	-	-	-
43	1313	4	-	-	-
44	1313	4	-	-	-
45	1924	1	PT	PT	-
46	1924	1	-	-	-
47	1924	1	-	-	-
48	1924	1	-	-	-
49	1924	1	-	-	-
50	1924	1	-	-	-
51	1924	1	-	-	-
52	1924	1	-	-	-
53	1924	1	-	-	-
54	1924	1	-	-	-
55	1924	1	-	-	-
56	1924	1	-	-	-
57	1924	1	-	-	-
58	1924	1	-	-	-
59	1924	1	-	-	-
60	1924	1	-	-	-
61	1924	1	-	-	-
62	1924	1	-	-	-
63	1924	1	-	-	-
64	1924	1	-	-	-
65	1924	1	-	-	-
66	1924	1	-	-	-
67	1924	1	-	-	-
68	1924	1	-	-	-
69	1924	1	CO	-	-
70	1927	1	-	-	-
71	1927	1	PT	PT	-
72	1927	1	-	-	-
73	1927	1	-	-	-
74	1927	1	-	-	-
75	1927	1	PT	-	-
76	1927	1	PT	PT	-
77	1927	1	-	-	-
78	1927	1	-	-	-
79	1927	1	CO	-	-
80	1927	1	-	-	-
81	1942	2	PT	-	-
82	1942	2	-	-	-
83	1942	2	PT	-	-
84	1942	2	-	-	-
85	1942	2	-	PT	-
86	1942	4	-	PT	-
87	1942	2	-	-	-
88	1942	2	PT	-	-
89	1943	2	-	-	-
90	1943	2	-	-	-
91	1943	1	-	-	-
92	1943	3	-	-	-
93	1943	2	-	-	-
PT: Pentatrichomonas hominis
CO: Cystoisospora ohioensis
